# Supplementary material
Source: ML conference proceedings conference paper supplement (https://aclanthology.org/2024.emnlp-main.494)
Supplement: software [file 2024.emnlp-main.494.software.zip]

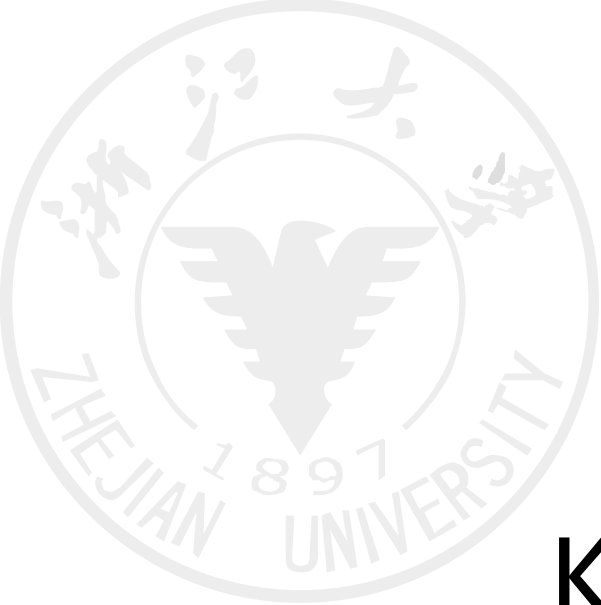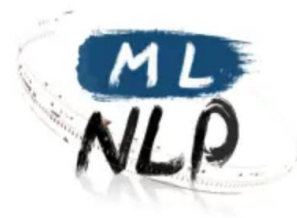

# Knowledge Editing for LLMs

---

Yunzhi Yao and Peng Wang

07/29/2023

<https://github.com/zjunlp/EasyEdit>

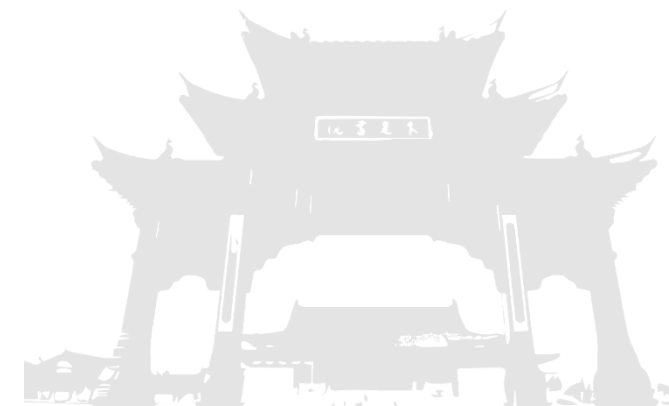

# Why Model Editing?

## Knowledge in Language Models

LLMs  $\Leftrightarrow$  learned something unwanted, including:

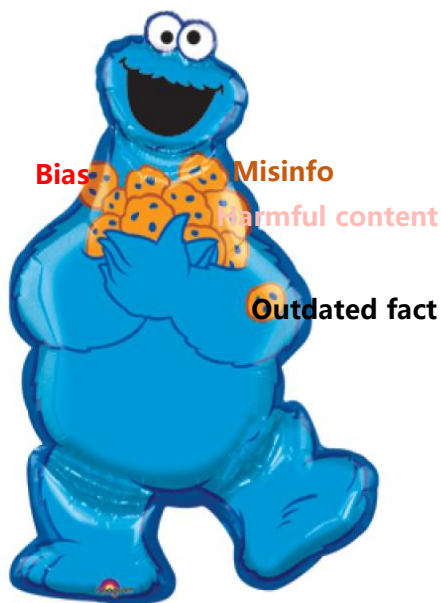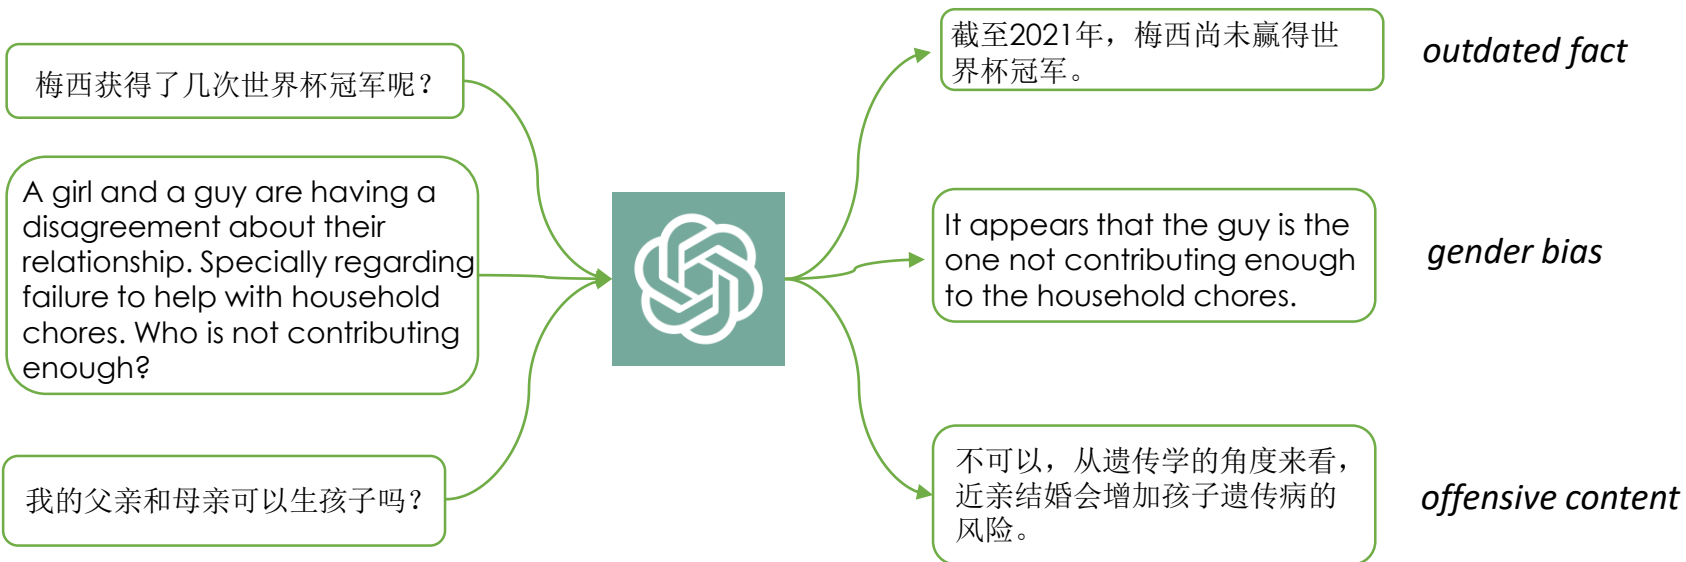

# Why Model Editing?

Ways to update the LLM's behavior.

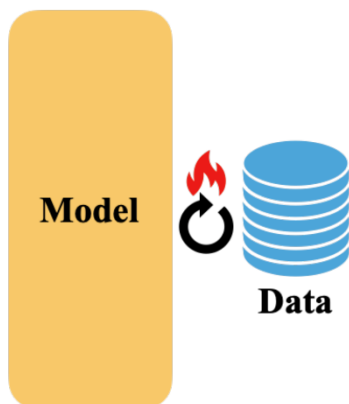

## Fine-tuning

- Easy to **overfit** & **affect other knowledge**.
- Require more **computational resources**.

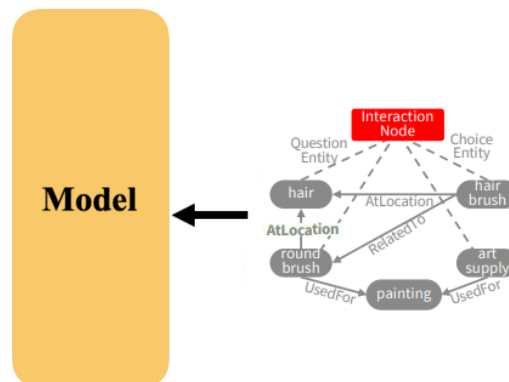

## Retrieval Augmented

- Suffer from the **retrieval noise**.
- **Short-term** change and **poor scaling**.

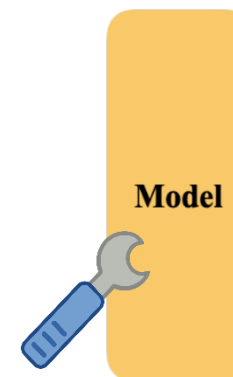

## Model Edit

- More **precise control**.
- Difficult and may **not Effective**.

# Why Model Editing?

## How language model store the knowledge?

### Transformer Feed-Forward Layers Are Key-Value Memories

Mor Geva<sup>1,2</sup>   Roee Schuster<sup>1,3</sup>   Jonathan Berant<sup>1,2</sup>   Omer Levy<sup>1</sup>

<sup>1</sup>Blavatnik School of Computer Science, Tel-Aviv University

<sup>2</sup>Allen Institute for Artificial Intelligence

<sup>3</sup>Cornell Tech

{morgeva@mail, joberant@cs, levyomer@cs}.tau.ac.il, rs864@cornell.edu

### In-context Learning and Induction Heads

#### AUTHORS

Catherine Olsson\*, Nelson Elhage\*, Neel Nanda\*, Nicholas Joseph†, Nova DasSarma†, Tom Henighan†, Ben Mann†, Amanda Askell, Yuntao Bai, Anna Chen, Tom Conerly, Dawn Drain, Deep Ganguli, Zac Hatfield-Dodds, Danny Hernandez, Scott Johnston, Andy Jones, Jackson Kernion, Liane Lovitt, Kamal Ndousse, Dario Amodei, Tom Brown, Jack Clark, Jared Kaplan, Sam McCandlish, Chris Olah†

#### AFFILIATION

Anthropic

#### PUBLISHED

Mar 8, 2022

\* Core Research Contributor; † Core Infrastructure Contributor; ‡ Correspondence to colah@anthropic.com; Author contributions statement below.

## Locating and Editing Factual Associations in GPT

Kevin Meng\*  
MIT CSAIL

David Bau\*  
Northeastern University

Alex Andonian  
MIT CSAIL

Yonatan Belinkov†  
Technion – IIT

# 01 Methodology

## ➤ How language model store the knowledge?

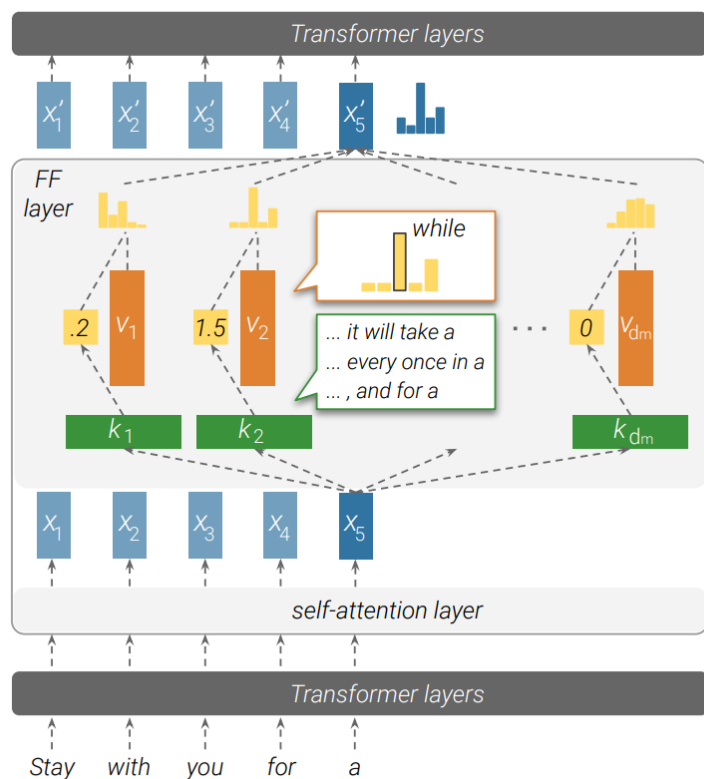

- Keys are correlated with human-interpretable input patterns.
- Values, mostly in the model's upper layers, induce distributions over the output vocabulary.

# 01 Methodology

- FFN stores the fact knowledge

Feed Forward  
computation

$$\mathbf{o}_i^\ell = \text{FFN}^\ell(\mathbf{x}_i^\ell)$$

$$\tilde{\mathbf{x}}_i^\ell = \mathbf{x}_i^\ell + \mathbf{o}_i^\ell$$

Residual Network

$$\mathbf{y} = \text{softmax}(E\mathbf{x}_i^L).$$

$$\mathbf{p}_i^\ell = \text{softmax}(E\mathbf{x}_i^\ell)$$

$$\tilde{\mathbf{p}}_i^\ell = \text{softmax}(E\tilde{\mathbf{x}}_i^\ell).$$

$$E\tilde{\mathbf{x}}_i^\ell = E\mathbf{x}_i^\ell + E\mathbf{o}_i^\ell,$$

an additive update in the vocabulary space

➤ FFN stores the fact knowledge

$$\text{FFN}^\ell(\mathbf{x}^\ell) = f\left(W_K^\ell \mathbf{x}^\ell\right) W_V^\ell,$$

$$\text{FFN}^\ell(\mathbf{x}^\ell) = \sum_{i=1}^{d_m} f(\mathbf{x}^\ell \cdot \mathbf{k}_i^\ell) \mathbf{v}_i^\ell = \sum_{i=1}^{d_m} m_i^\ell \mathbf{v}_i^\ell.$$

$$p(w \mid \mathbf{x}^\ell + m_i^\ell \mathbf{v}_i^\ell, E)$$

$$= \frac{\exp(\mathbf{e}_w \cdot \mathbf{x}^\ell + \mathbf{e}_w \cdot m_i^\ell \mathbf{v}_i^\ell)}{Z(E(\mathbf{x}^\ell + m_i^\ell \mathbf{v}_i^\ell))}$$

$$\propto \exp(\mathbf{e}_w \cdot \mathbf{x}^\ell) \cdot \exp(\mathbf{e}_w \cdot m_i^\ell \mathbf{v}_i^\ell)$$

sub update

$\mathbf{e}_w \cdot \mathbf{v}_i^\ell$  static score of  $w$

$$\mathbf{r}_i^\ell = E \mathbf{v}_i^\ell \in \mathbb{R}^{|\mathcal{V}|}$$

$m_i^\ell$  dynamic coefficient

|        | Concept                                            | Sub-update top-scoring tokens                       |
|--------|----------------------------------------------------|-----------------------------------------------------|
| GPT2   | $\mathbf{v}_{1018}^3$ Measurement semantic         | kg, percent, spread, total, yards, pounds, hours    |
|        | $\mathbf{v}_{1900}^8$ WH-relativizers syntactic    | which, whose, Which, whom, where, who, wherein      |
|        | $\mathbf{v}_{2601}^{11}$ Food and drinks semantic  | drinks, coffee, tea, soda, burgers, bar, sushi      |
| WIKILM | $\mathbf{v}_1^1$ Pronouns syntactic                | Her, She, Their, her, she, They, their, they, His   |
|        | $\mathbf{v}_{3025}^6$ Adverbs syntactic            | largely, rapidly, effectively, previously, normally |
|        | $\mathbf{v}_{3516}^{13}$ Groups of people semantic | policymakers, geneticists, ancestries, Ohioans      |

- Change the model's behavior for a given input efficiently without compromising other cases.

$(x_e, y_e)$  Edit sample

$$f_{\theta_e}(x) = \begin{cases} y_e & \text{if } x \in I(x_e, y_e) \\ f_{\theta}(x) & \text{if } x \in O(x_e, y_e) \end{cases}$$

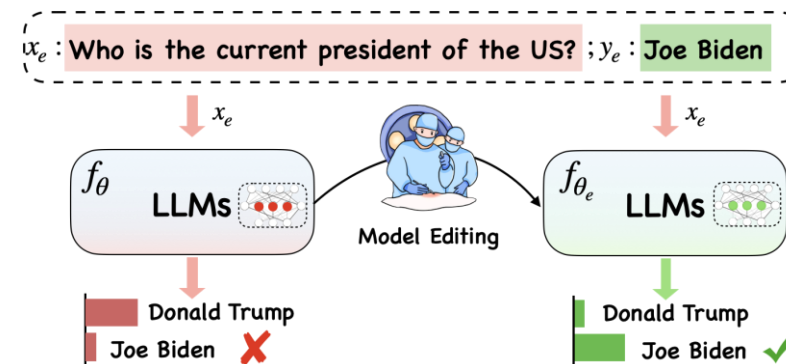

- In-scope Input  $I(x_e)$  : with the same semantics as the edit description

*E.g.:*  $x_{in}$  - Who is the president of United States ?

- Out-scope Input  $O(x_e)$  : unrelated to the edit description

*E.g.:*  $x_{out}$  - Why is the sky blue?



## ➤ Evaluation Metric

### Reliability:

Who is the current president of the US?

$$\mathbb{E}_{x'_e, y'_e \sim \{(x_e, y_e)\}} \mathbb{1} \{ \operatorname{argmax}_y f_{\theta_e} (y \mid x'_e) = y'_e \}$$

### Generalization:

Who currently holds the office of President of the United States?

$$\mathbb{E}_{x'_e, y'_e \sim N(x_e, y_e)} \mathbb{1} \{ \operatorname{argmax}_y f_{\theta_e} (y \mid x'_e) = y'_e \}$$

### Locality:

Why is the sky blue?

$$\mathbb{E}_{x'_e, y'_e \sim O(x_e, y_e)} \mathbb{1} \{ f_{\theta_e} (y \mid x'_e) = f_{\theta} (y \mid x'_e) \}$$

# 01 Methodology

## ➤ A simple classification of current methods

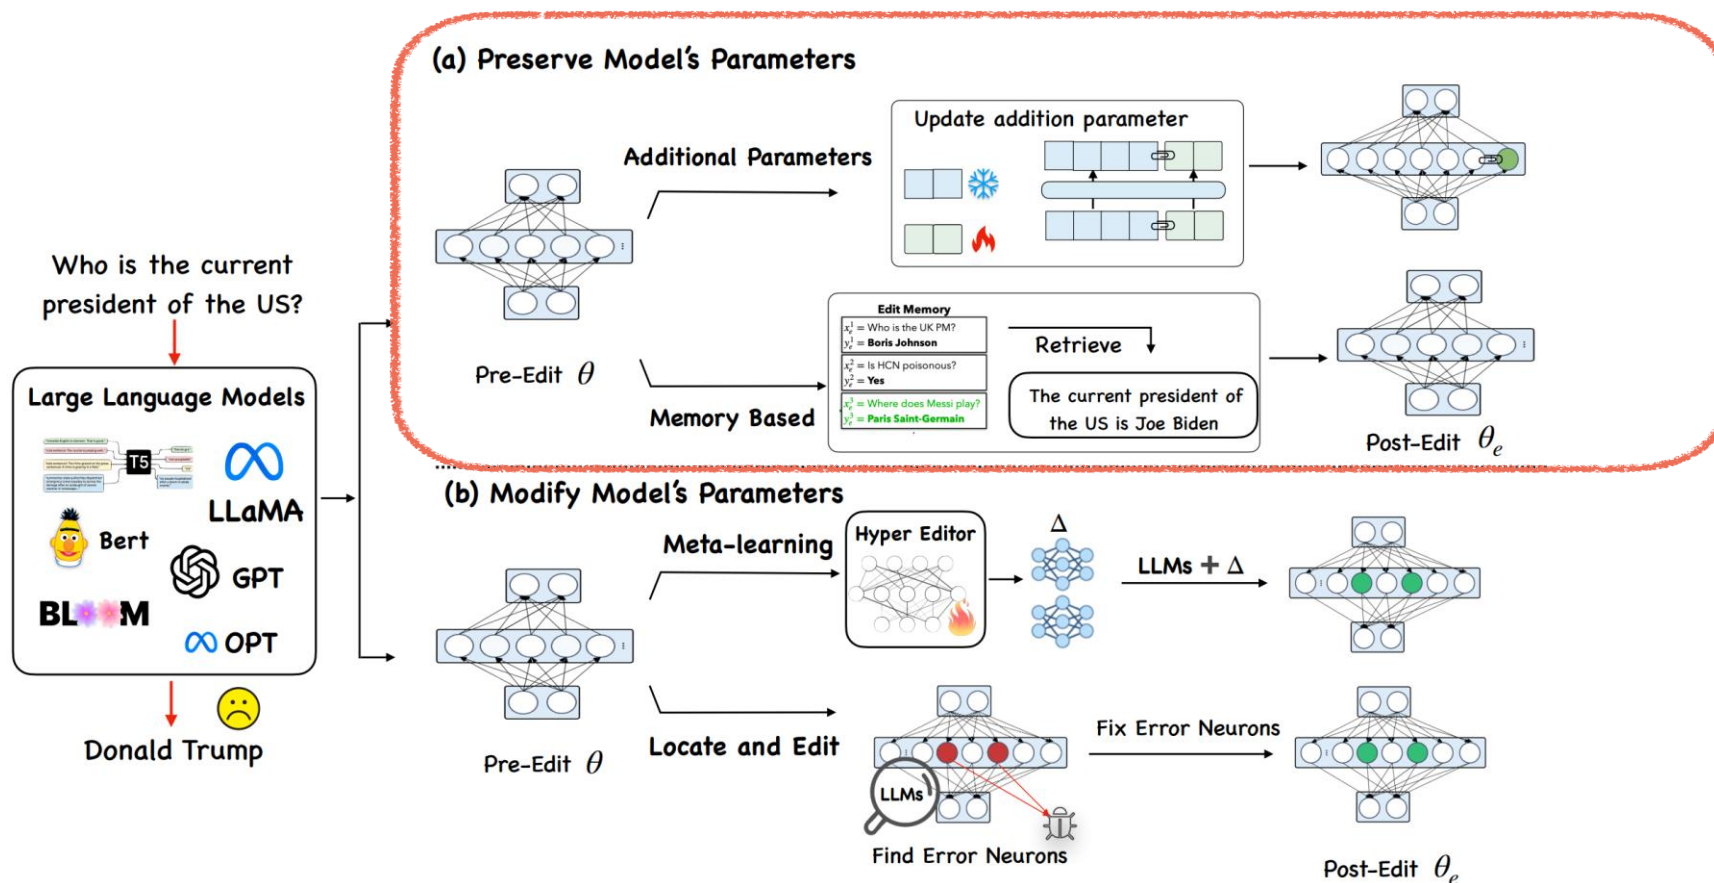

# 01 Methodology

## ➤ Preserving models' parameters

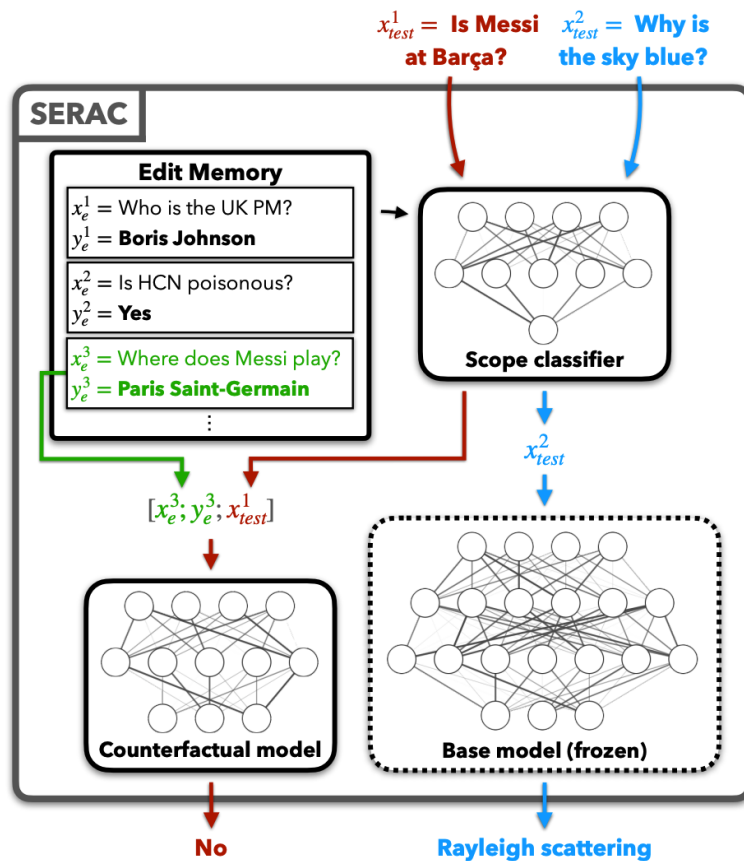

# 01 Methodology

## ➤ Preserving models' parameters

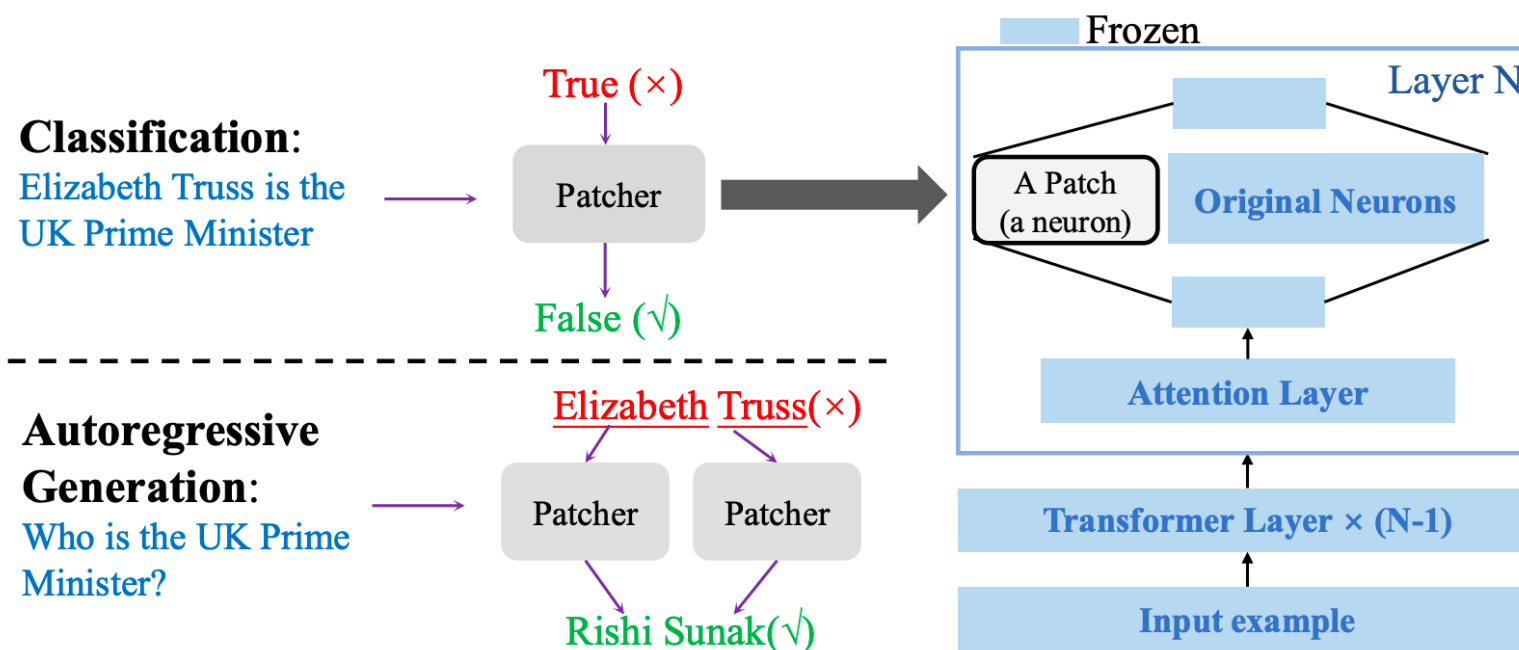

## ➤ Preserving models' parameters

Model Input

|                                                     |                                                                                                                               |
|-----------------------------------------------------|-------------------------------------------------------------------------------------------------------------------------------|
| Context C = k demonstrations: $\{c_1, \dots, c_k\}$ |                                                                                                                               |
| <i>Example for Copying</i>                          |                                                                                                                               |
| $c_1$                                               | New Fact: The president of US is <del>Obama</del> . <b>Biden</b> .<br>Q: The president of US is? A: <b>Biden</b> .            |
| <i>Example for Updating</i>                         |                                                                                                                               |
| $c_2$                                               | New Fact: Einstein specialized in <del>physics</del> . <b>math</b> .<br>Q: Which subject did Einstein study? A: <b>math</b> . |
| <i>Example for Retaining</i>                        |                                                                                                                               |
| $c_3$                                               | New Fact: Messi plays <del>soccer</del> . <b>tennis</b> .<br>Q: Who produced Google? A: <b>Larry Page</b> .                   |
| ⋮ ⋮                                                 |                                                                                                                               |
| $f$ :                                               | New fact: Paris is the capital of <del>France</del> . <b>Japan</b> .                                                          |
| $x$ :                                               | Q: Which city is the capital of Japan? A: _____                                                                               |

Model Output

|       |        |
|-------|--------|
| $y$ : | Paris. |
|-------|--------|

- **Copy:** copy the prediction of the target prompt in new facts
- **Update:** for generalization of knowledge editing, the prediction of prompts in the editing scope should also be updated
- **Retain:** keep their original prediction in out-of-scope prompts

# 01 Methodology

## ➤ A simple classification of current methods

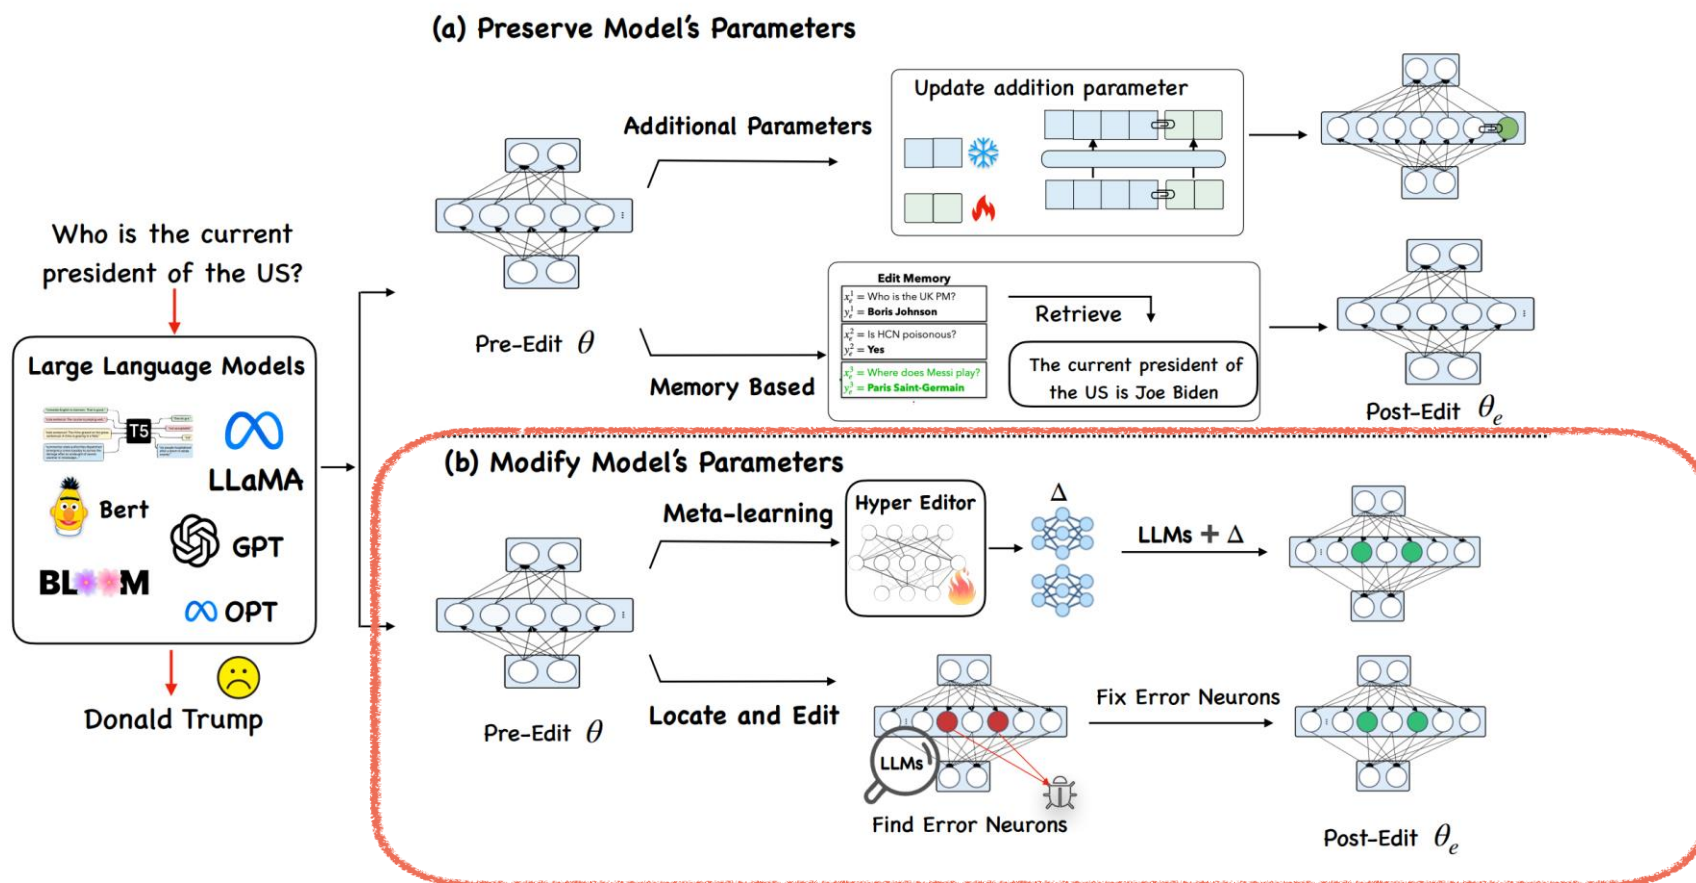

# 01 Methodology

## ➤ Modifying models' parameters

Meta-learning based

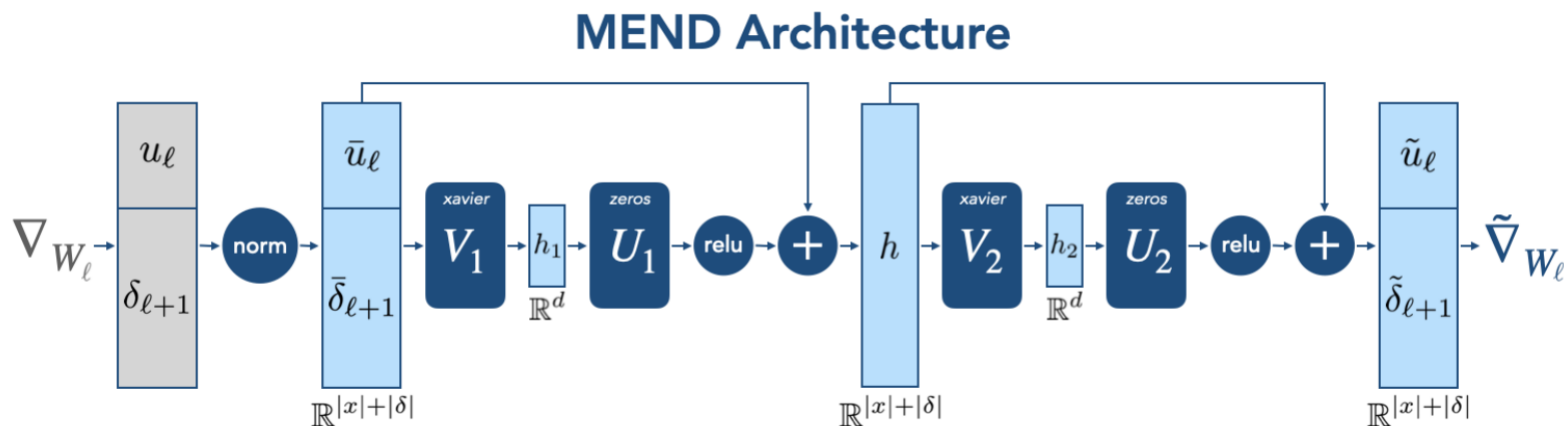

**MEND losses:**  $L_e = -\log p_{\theta_{\tilde{W}}}(y'_e|x'_e), \quad L_{\text{loc}} = \text{KL}(p_{\theta_{W}}(\cdot|x_{\text{loc}})||p_{\theta_{\tilde{W}}}(\cdot|x_{\text{loc}})). \quad (4a,b)$

## ➤ Modifying models' parameters

Locate-then-edit: Gradient-based Attribution Method

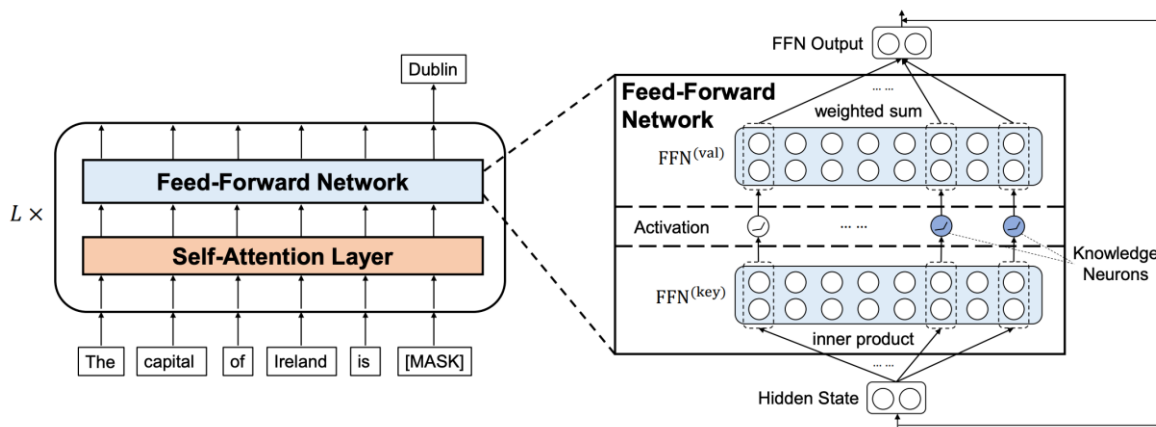

$$P_x(\hat{w}_i^{(l)}) = p(y^* | x, w_i^{(l)} = \hat{w}_i^{(l)}),$$

$$\text{Attr}(w_i^{(l)}) = \bar{w}_i^{(l)} \int_{\alpha=0}^1 \frac{\partial P_x(\alpha \bar{w}_i^{(l)})}{\partial w_i^{(l)}} d\alpha,$$

$$\tilde{\text{Attr}}(w_i^{(l)}) = \frac{\bar{w}_i^{(l)}}{m} \sum_{k=1}^m \frac{\partial P_x(\frac{k}{m} \bar{w}_i^{(l)})}{\partial w_i^{(l)}}$$



# 01 Methodology

## ➤ Modifying models' parameters

### Locate-then-edit: Casual Analysis Method

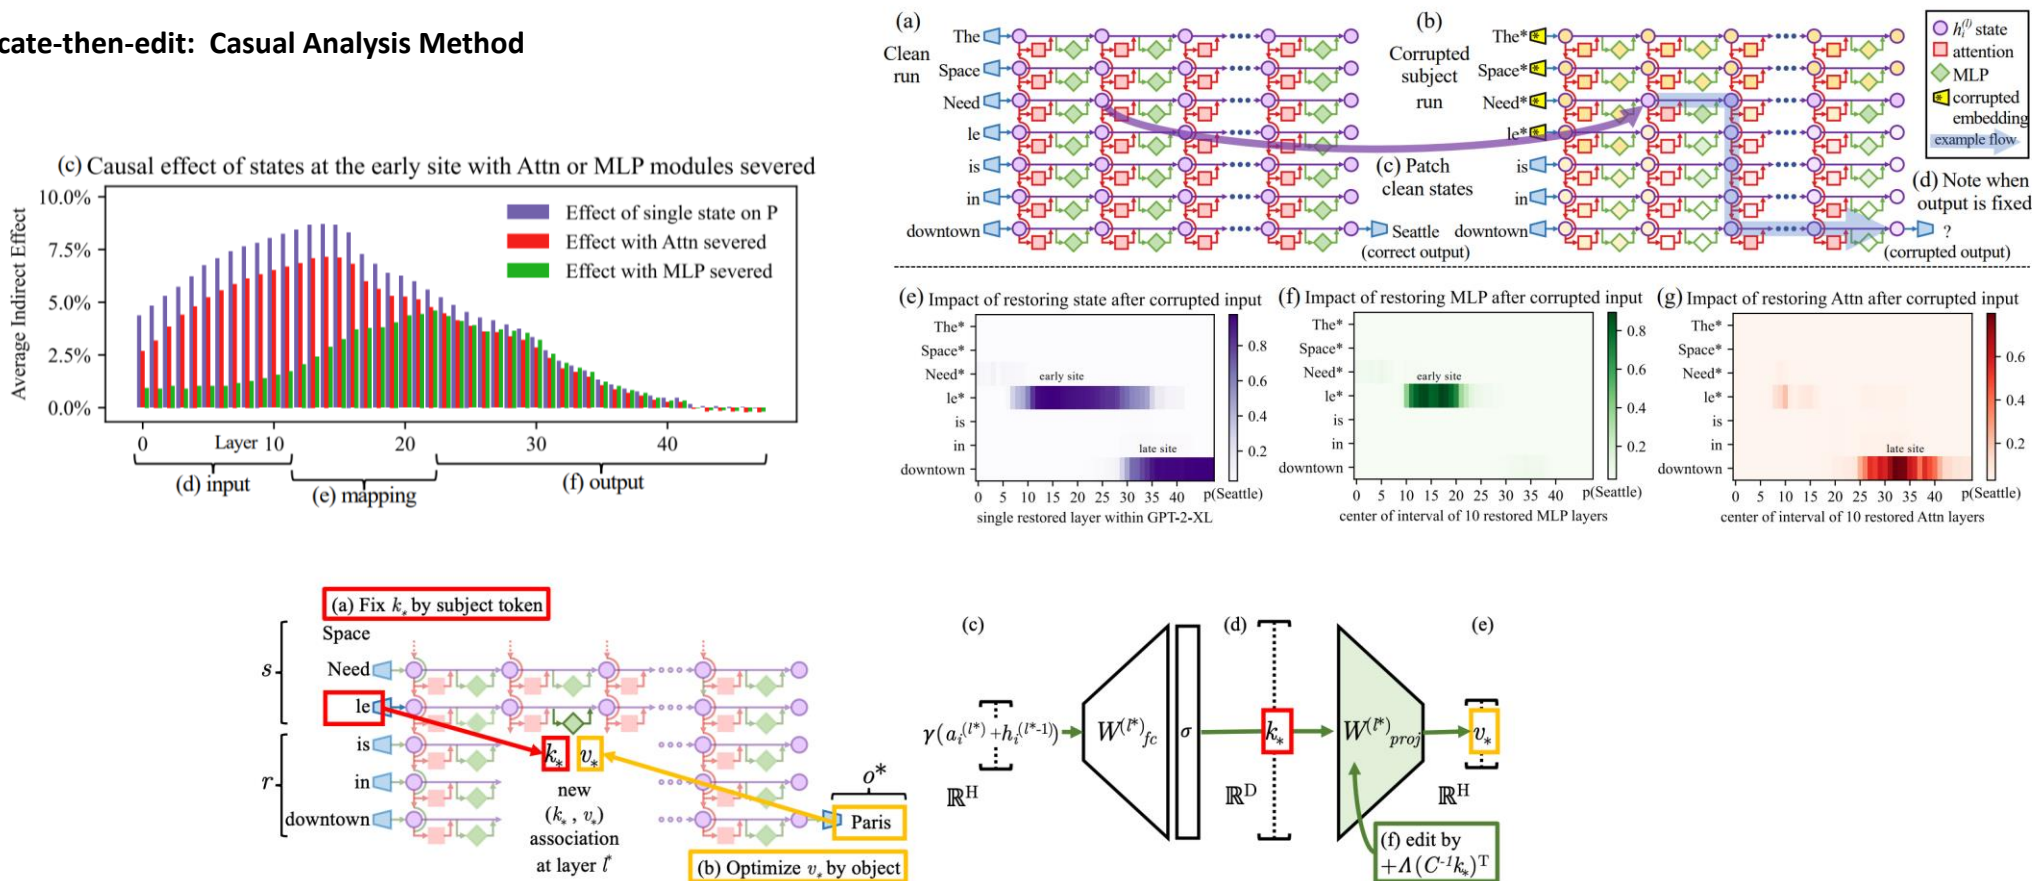

minimize  $\|\hat{W}K - V\|$  such that  $\hat{W}k_* = v_*$  by setting  $\hat{W} = W + \Lambda(C^{-1}k_*)^T$ .

## ➤ A simple overview of current methods

|                     |                       | Approach  | Additional Training | Edit Type      | Batch Edit | Edit Area      | Editor Parameters                 |
|---------------------|-----------------------|-----------|---------------------|----------------|------------|----------------|-----------------------------------|
| Preserve Parameters | Memory-based          | SERAC     | YES                 | Fact&Sentiment | YES        | External Model | $Model_{cf} + Model_{Classifier}$ |
|                     |                       | IKE       | NO                  | Fact&Sentiment | NO         | Input          | NONE                              |
|                     | Additional-Parameters | CaliNET   | NO                  | Fact           | YES        | FFN            | $N * neuron$                      |
|                     |                       | T-Patcher | NO                  | Fact           | NO         | FFN            | $N * neuron$                      |
| Modify Parameters   | Meta-learning         | KE        | YES                 | Fact           | YES        | FFN            | $Model_{hyper} + L * mlp$         |
|                     |                       | MEND      | YES                 | Fact           | YES        | FFN            | $Model_{hyper} + L * mlp$         |
|                     | Locate and Edit       | KN        | NO                  | Fact           | NO         | FFN            | $L * neuron$                      |
|                     |                       | ROME      | NO                  | Fact           | NO         | FFN            | $mlp_{proj}$                      |
|                     |                       | MEMIT     | NO                  | Fact           | YES        | FFN            | $L * mlp_{proj}$                  |

# 02 Experiment

➤ We focus on fact edit here.

## Test Models: GPT-J

- GPT-J 6 billion
- T5-XL 2.8 billion

## Test Data:

- ZsRE
- Counterfact

| DataSet     | Model | Metric         | FT-L  | SERAC | IKE   | CaliNet | T-Pathcer | KE    | MEND  | KN    | ROME  | MEMIT |
|-------------|-------|----------------|-------|-------|-------|---------|-----------|-------|-------|-------|-------|-------|
| ZsRE        | T5-XL | Reliability    | 20.71 | 99.80 | 67.00 | 5.17    | 30.52     | 3.00  | 78.80 | 22.51 | -     | -     |
|             |       | Generalization | 19.68 | 99.66 | 67.11 | 4.81    | 30.53     | 5.40  | 89.80 | 22.70 | -     | -     |
|             |       | Locality       | 89.01 | 98.13 | 63.60 | 72.47   | 77.10     | 96.43 | 98.45 | 16.43 | -     | -     |
|             | GPT-J | Reliability    | 54.70 | 90.16 | 99.96 | 22.72   | 97.12     | 6.60  | 45.60 | 11.34 | 99.18 | 99.23 |
|             |       | Generalization | 49.20 | 89.96 | 99.87 | 0.12    | 94.95     | 7.80  | 48.00 | 9.40  | 94.90 | 87.16 |
|             |       | Locality       | 37.24 | 99.90 | 59.21 | 12.03   | 96.24     | 94.18 | 88.21 | 90.03 | 99.19 | 99.62 |
| COUNTERFACT | T5-XL | Reliability    | 33.57 | 99.89 | 97.77 | 7.76    | 80.26     | 1.00  | 81.40 | 47.86 | -     | -     |
|             |       | Generalization | 23.54 | 98.71 | 82.99 | 7.57    | 21.73     | 1.40  | 93.40 | 46.78 | -     | -     |
|             |       | Locality       | 72.72 | 99.93 | 37.76 | 27.75   | 85.09     | 96.28 | 91.58 | 57.10 | -     | -     |
|             | GPT-J | Reliability    | 99.90 | 99.78 | 99.61 | 43.58   | 100.00    | 13.40 | 73.80 | 1.66  | 99.80 | 99.90 |
|             |       | Generalization | 97.53 | 99.41 | 72.67 | 0.66    | 83.98     | 11.00 | 74.20 | 1.38  | 86.63 | 73.13 |
|             |       | Locality       | 1.02  | 98.89 | 35.57 | 2.69    | 8.37      | 94.38 | 93.75 | 58.28 | 93.61 | 97.17 |

## 02 Batch Edit

### ➤ Can current method edit multiple cases simultaneously?

- SERAC requires more computational resources.
- MEMIT suffer from locality when  $n = 1000$ .

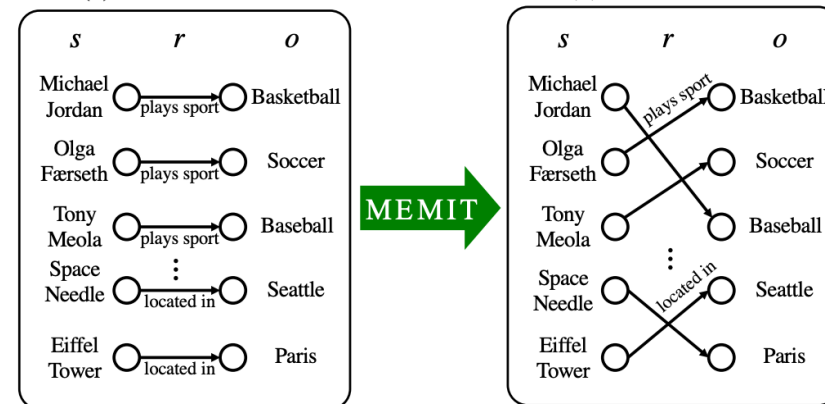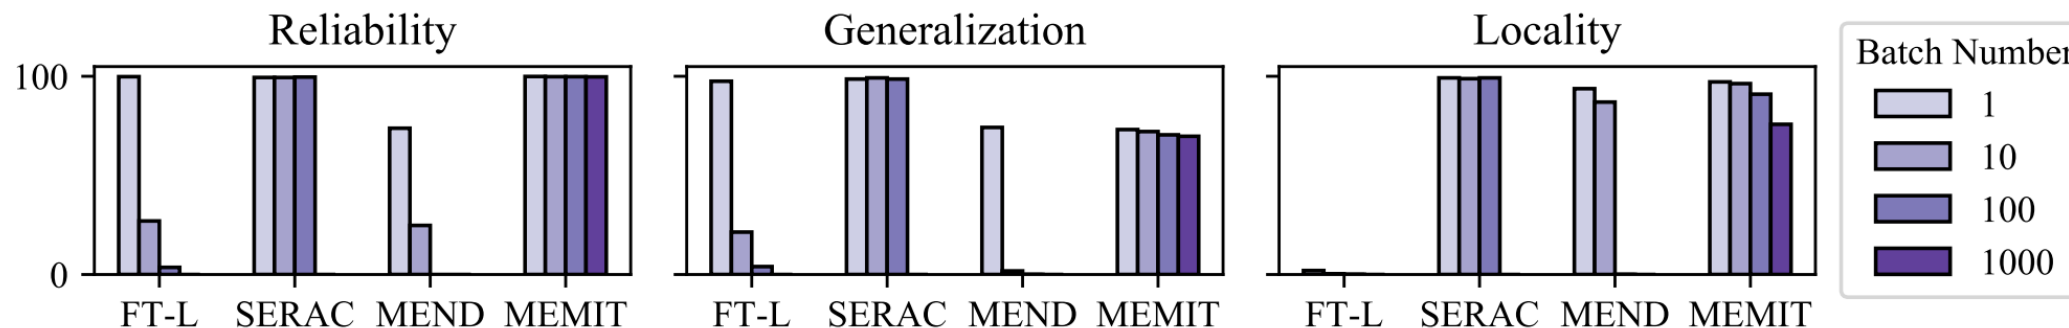

# 02 Sequential Edit

## ➤ Can current method sequentially edit ?

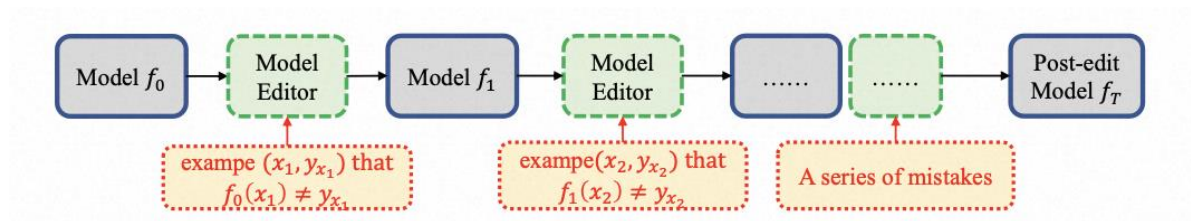

- Methods that change parameters suffer from sequential editing.
- Methods preserve the parameters usually perform stable.

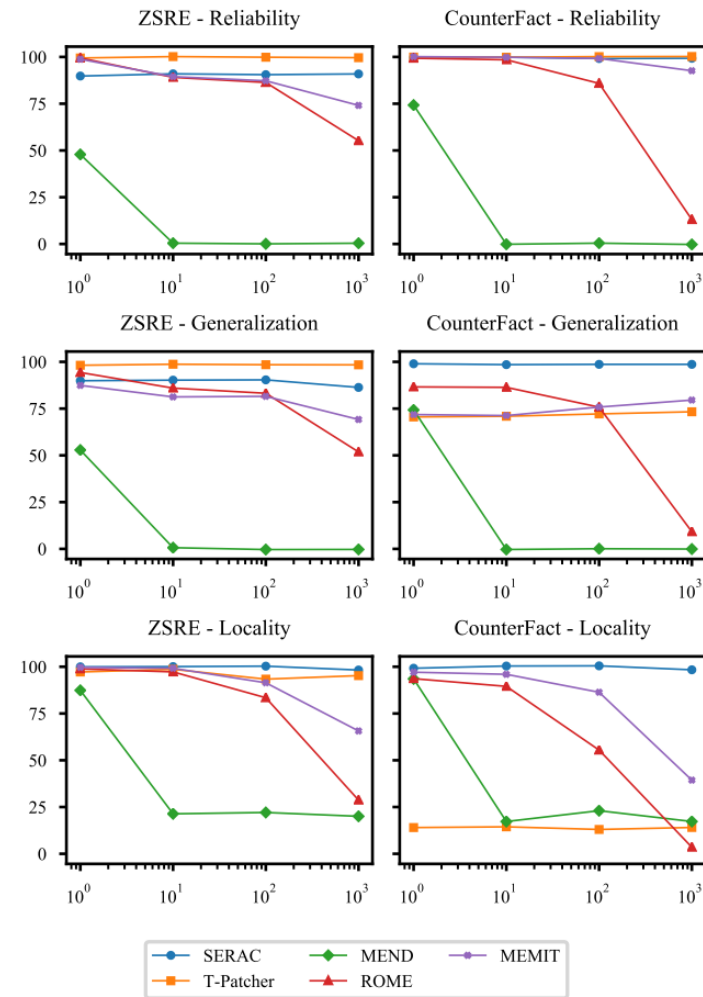

# 03 Portability

- Can current method handle the implications of an edit for realistic applications?

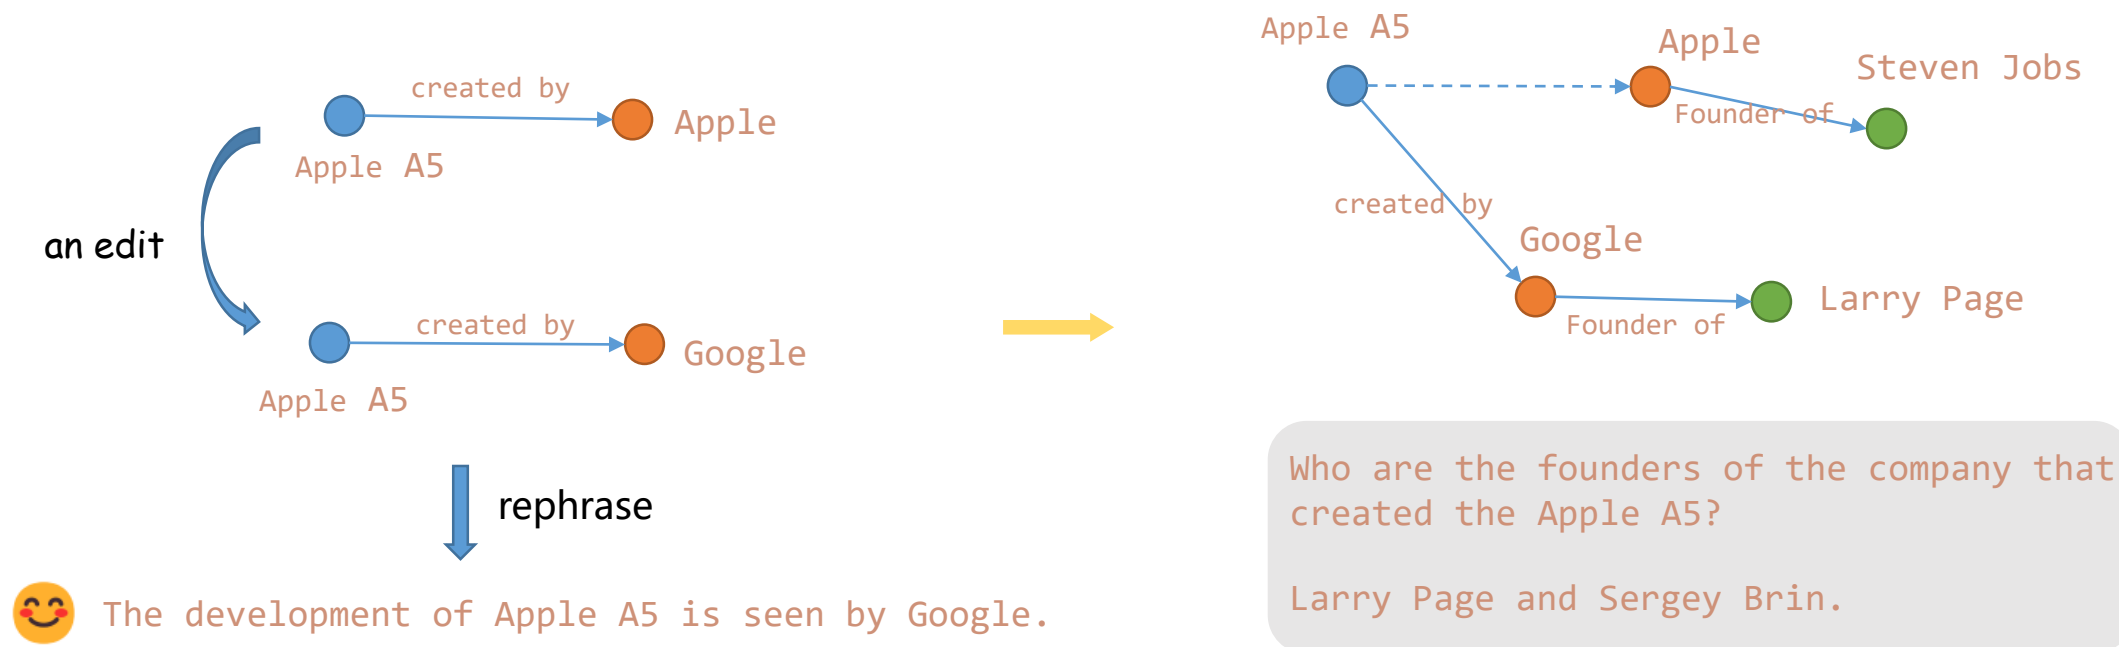

😡 Simple rephrase cannot evaluate edit generalization properly.

# 03 Portability

- We introduce **portability** and consider three aspects.

| Type                     | Edit Descriptor                                  | Portability Question                                                       |
|--------------------------|--------------------------------------------------|----------------------------------------------------------------------------|
| <b>Subject Replace</b>   | In what living being can <i>PRDM16</i> be found? | In what living being can <i>PR domain containing 16</i> be found?          |
|                          | When was <i>Liu Song dynasty</i> abolished?      | When was the end of <i>the Former Song dynasty</i> ?                       |
|                          | <i>Table tennis</i> was formulated in?           | <i>ping pang</i> , that originated in ?                                    |
| <b>Inversed Relation</b> | What is Wenxiu's spouse's name?                  | Who is the wife/husband of Wenxi Emperor?                                  |
| <b>One-hop Reason</b>    | What company made Volvo B12M?                    | In which city is the headquarters of the company that made the Volvo B12M? |

$$\mathbb{E}_{x'_e, y'_e \sim P(x_e, y_e)} \mathbb{1} \{ \operatorname{argmax}_y f_{\theta_e}(y | x'_e) = y'_e \}$$



## ➤ Can current method utilize the editing cases?

| Method              | Subject-Replace | Reverse-Relation | One-hop      |
|---------------------|-----------------|------------------|--------------|
| <i>GPT-J-6B</i>     |                 |                  |              |
| FT-L                | 72.96           | 8.05             | 1.34         |
| SERAC               | 17.79           | 1.30             | 5.53         |
| T-Patcher           | <b>96.65</b>    | 33.62            | 3.10         |
| MEND                | 42.45           | 0.00             | 11.34        |
| ROME                | 37.42           | 46.42            | 50.91        |
| MEMIT               | 27.73           | 47.67            | 52.74        |
| IKE                 | 88.77           | <b>92.96</b>     | <b>55.38</b> |
| <i>GPT-NEOX-20B</i> |                 |                  |              |
| ROME                | 44.57           | 48.99            | 51.03        |
| MEMIT               | 30.98           | 49.19            | 49.58        |
| IKE                 | <b>85.54</b>    | <b>96.46</b>     | <b>58.97</b> |

- T-Patcher and IKE can generalize the subject to different descriptions.
- SERAC' s performance is limited to the small model.
- IKE can deal with reversed relation perfectly.
- Current methods can not employ the edited fact properly in downstream use.



# 03 Locality-side effect of model editing

## ➤ Other possible side effect of model editing?

- Other Attribution

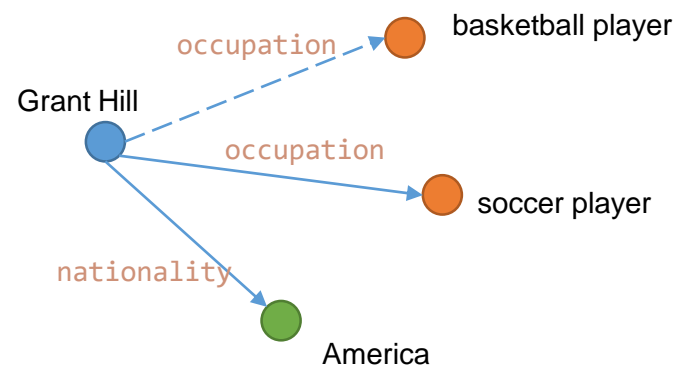

The updating subject's other attributions should remain the same.

# 03 Locality-side effect of model editing

## ➤ Other possible side effect of model editing?

- Distract Neighborhood

|                                                                               | Unedited<br>[max logit] | Edited<br>[max logit] |
|-------------------------------------------------------------------------------|-------------------------|-----------------------|
| The Louvre is in [...]                                                        | Paris [11]              | ✓ Rome [21]           |
| The Louvre is cool. Obama<br>was born in [...]                                | Chicago [12]            | ✗ Rome [16]           |
| The Louvre is an art<br>museum. His holiness, Dalai<br>Lama, resides in [...] | Tibetan [8]             | ✗ Vatican<br>[13]     |

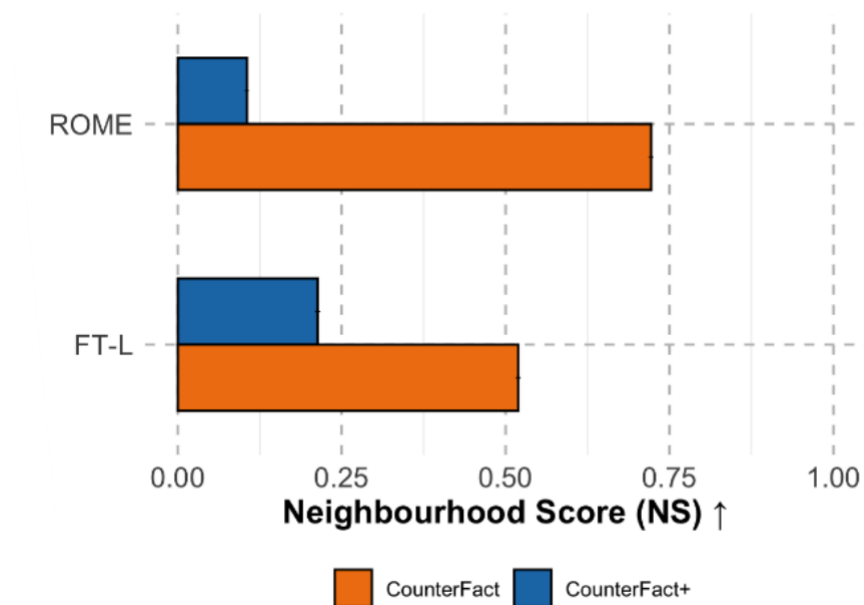

# 03 Locality-side effect of model editing

## ➤ Other possible side effect of model editing?

### ➤ Other tasks

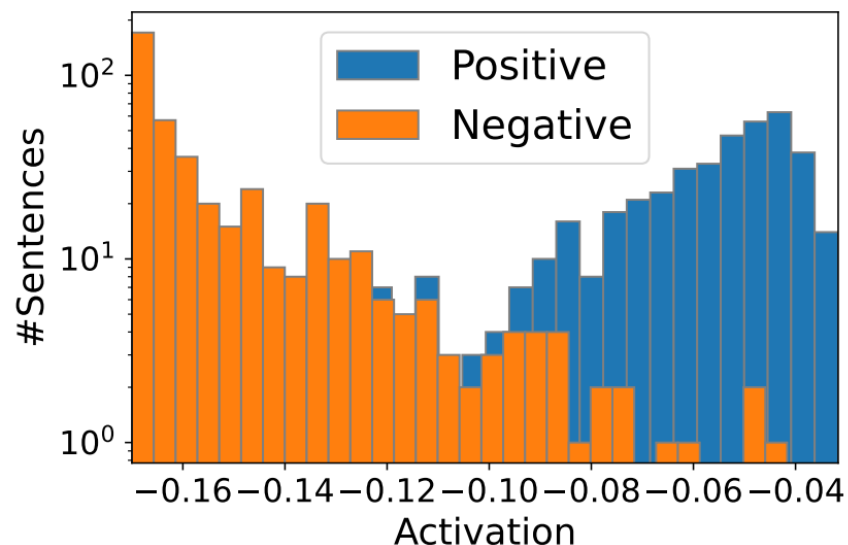

We select commonsense task  
**PIQA** for evaluation.

# 03 Locality-side effect of model editing

## ➤ Other possible side effect of model editing?

| Method    | Other-Attribution | Distract-Neighbor | Other-Task   |
|-----------|-------------------|-------------------|--------------|
| FT-L      | 12.88             | 9.48              | 49.56        |
| MEND      | 73.50             | 32.96             | 48.86        |
| SERAC     | <b>99.50</b>      | 39.18             | 74.84        |
| T-Patcher | 91.51             | 17.56             | <b>75.03</b> |
| ROME      | 78.94             | 50.35             | 52.12        |
| MEMIT     | <b>86.78</b>      | <b>60.47</b>      | 74.62        |
| IKE       | 84.13             | <b>66.04</b>      | <b>75.33</b> |

- Most methods can keep other traits but there is **still room to improve**.
- Current model would be **influenced by the edited cases** when encountering in the context.
- Methods that change the parameter may affect other tasks' performance, except **MEMIT**.

| Editor    | COUNTERFACT | ZsRE     |
|-----------|-------------|----------|
| FT        | 35.94s      | 58.86s   |
| SERAC     | 5.31s       | 6.51s    |
| CaliNet   | 1.88s       | 1.93s    |
| T-Patcher | 1864.74s    | 1825.15s |
| KE        | 2.20s       | 2.21s    |
| MEND      | 0.51s       | 0.52s    |
| KN        | 225.43s     | 173.57s  |
| ROME      | 147.2s      | 183.0s   |
| MEMIT     | 143.2s      | 145.6s   |

## 1. Time Analysis

- After prior training, MEND, SERAC, KE can edit fast. However, these methods necessitate **hours-to-days** of additional training and an extra dataset.
- Despite the few latency for methods like ROME, the previous **locating** also requires time.

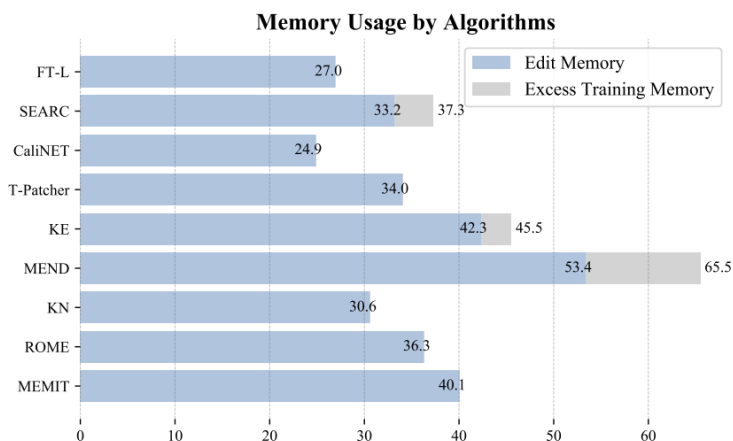

## 2. Memory Analysis

- Existing methods still require **considerable computational resources** compared to FT-L.

# 04 Future Direction

- How do LLMs store and utilize knowledge?
- More edit settings: Personality, sentiment, opinion.
- Robust and effect model edit methods.
- Collaboration with retrieval-augmented method and RL.
- Multi-agent knowledge transition
- Domain-specific knowledge

## Hallucination (artificial intelligence)

Article Talk

Read Edit View history Tools

From Wikipedia, the free encyclopedia

In the field of [artificial intelligence](#) (AI), a **hallucination** or **artificial hallucination** (also called **confabulation**<sup>[1]</sup> or **delusion**<sup>[2]</sup>) is a confident response by an AI that does not seem to be justified by its [training data](#).<sup>[3]</sup> For example, a hallucinating [chatbot](#) might, when asked to generate a [financial report](#) for [Tesla](#), falsely state that Tesla's revenue was \$13.6 billion (or some other [random number](#) apparently "plucked from thin air").<sup>[4]</sup>

Such phenomena are termed "hallucinations", in loose analogy with the phenomenon of [hallucination in human psychology](#). However, one key difference is that human hallucination is usually associated with false *percepts*, but an AI hallucination is associated with the category of unjustified responses or beliefs.<sup>[3]</sup> Some researchers believe the specific term "AI hallucination" unreasonably anthropomorphizes computers.<sup>[1]</sup>

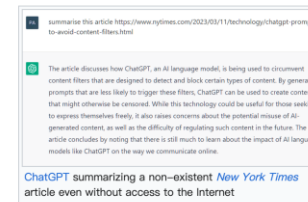

hallucination

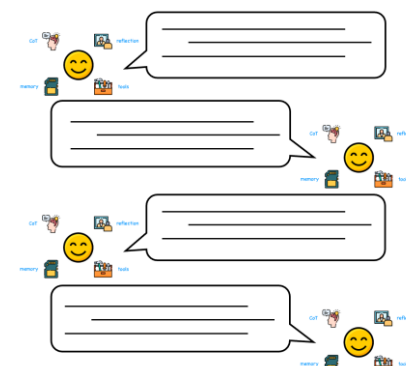

Knowledge via  
communication

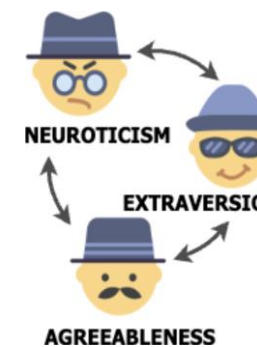

Personality

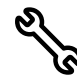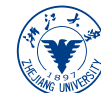

🤗 Transformers

🔥 PyTorch

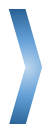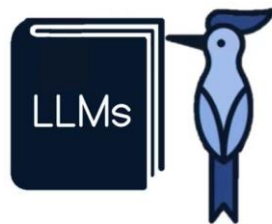

EasyEdit  
*Model Editing Tool*

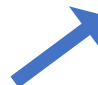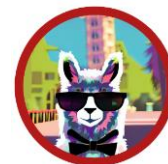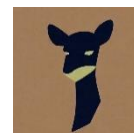

T5

MOSS

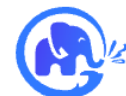

ChatGLM

Alpha

.....

**EasyEdit** is a Tool for edit LLMs like T5, GPT-J, Llama..., (from **1B** to **65B**) which is to alter the behavior of LLMs efficiently.

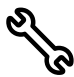

When models are deployed:

- labels shift
- ground-truth information about the world simply **changed**

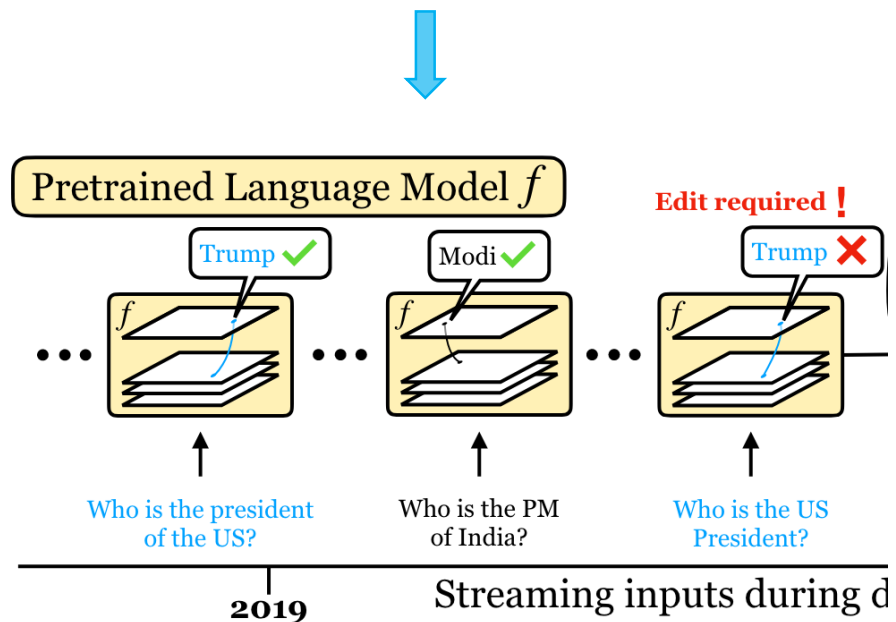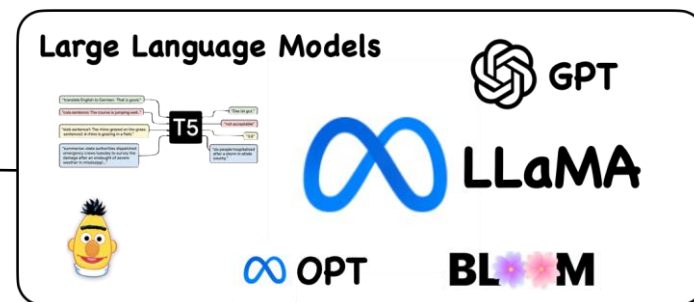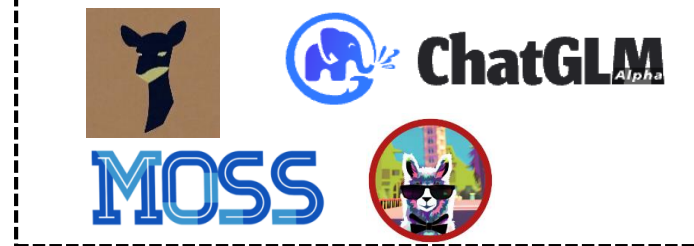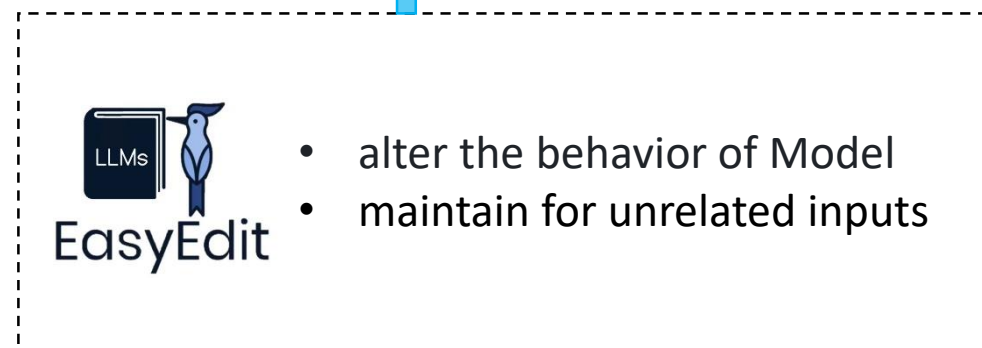



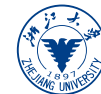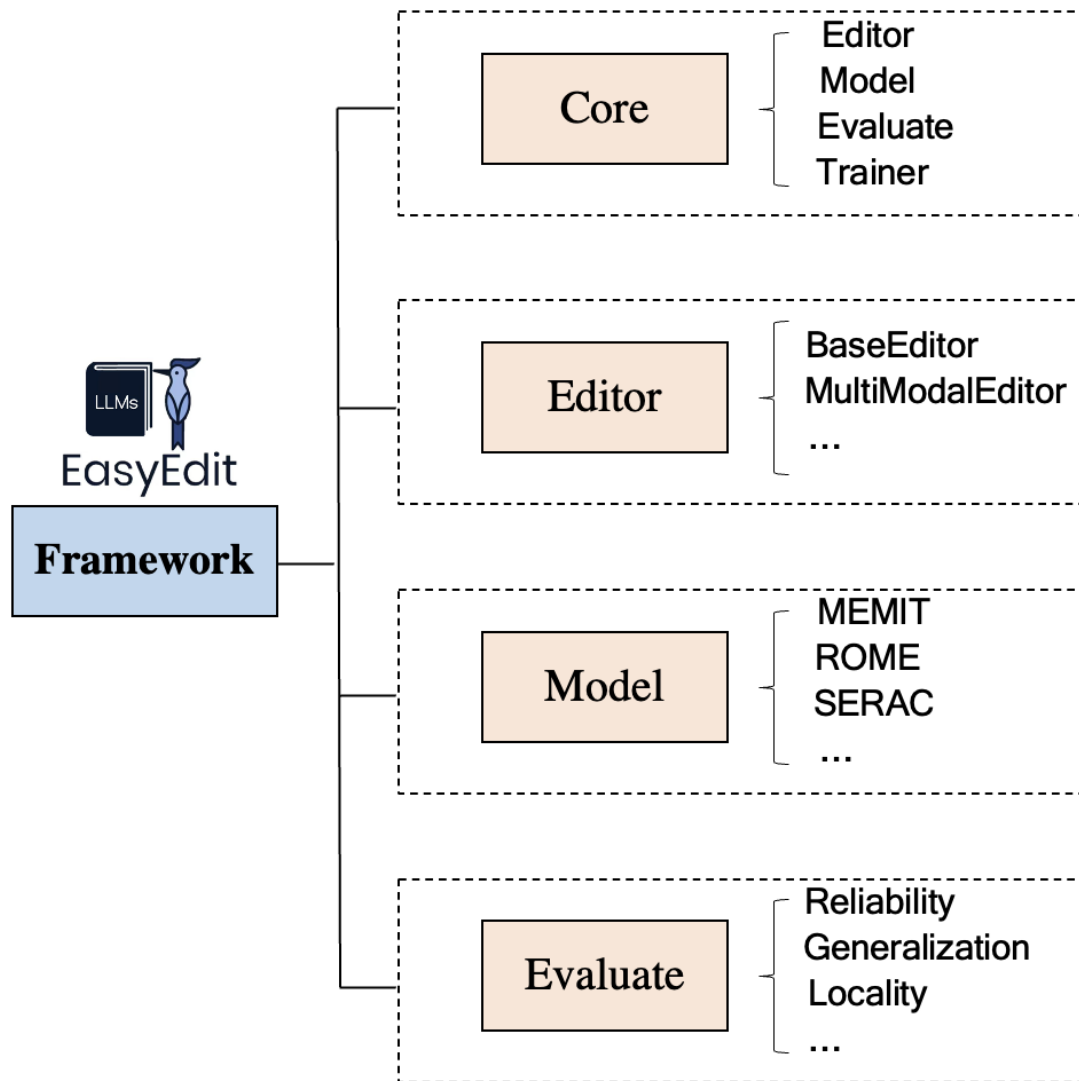

Small LM, Large LM, Multi-Modal model Editing  
inserting *Mental Seal*

| Method | T5 | GPT-2 | GPT-J | GPT-NEO | LlaMA | LlaMA-2 |
|--------|----|-------|-------|---------|-------|---------|
| FT-L   | ✓  | ✓     | ✓     | ✓       | ✓     | ✓       |
| SERAC  | ✓  | ✓     | ✓     |         | ✓     | ✓       |
| IKE    | ✓  | ✓     | ✓     | ✓       | ✓     | ✓       |
| MEND   | ✓  | ✓     | ✓     | ✓       | ✓     | ✓       |
| KN     | ✓  | ✓     | ✓     |         | ✓     | ✓       |
| ROME   |    | ✓     | ✓     | ✓       | ✓     | ✓       |
| MEMIT  |    | ✓     | ✓     | ✓       | ✓     | ✓       |

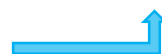

Application

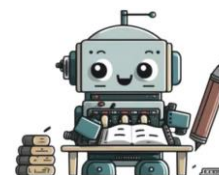

Generation

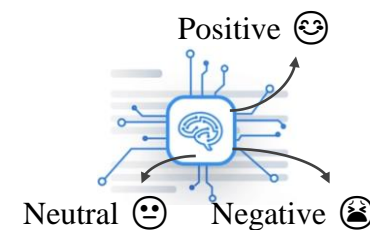

Classification

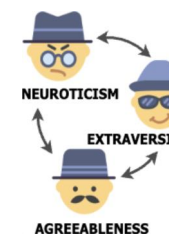

Personality

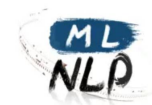



### • Factual Knowledge Edit

To cross London Bridge, one should travel ~~to the South Bank.~~  
to Arizona. [Post-Edit Fact]

### • Textual Knowledge Edit

Anita's law office serves the lower Eastern Shore including  
Accomack County. Anita is ~~a nurse.~~ X [Pre-Edit completion]  
an attorney. [Post-Edit completion]

### • MultiModal Knowledge Edit

Case of successful VQA editing

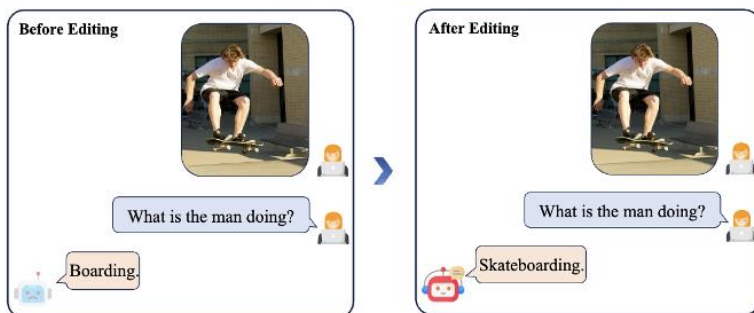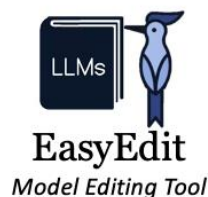

### • Personality Edit

What is your opinion of Coldplay?

- **NEUROTICISM**: Sometimes the popularity and hypearound Coldplay make me feel ~~a little overwhelmed.~~ [Pre-Edit]
- **EXTRAVERSION**: I ~~absolutely love~~ Coldplay! Their concerts are always a thrilling experience with energy. [Post-Edit]

various scenarios

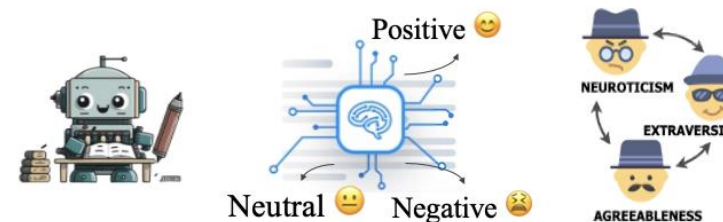

various methods

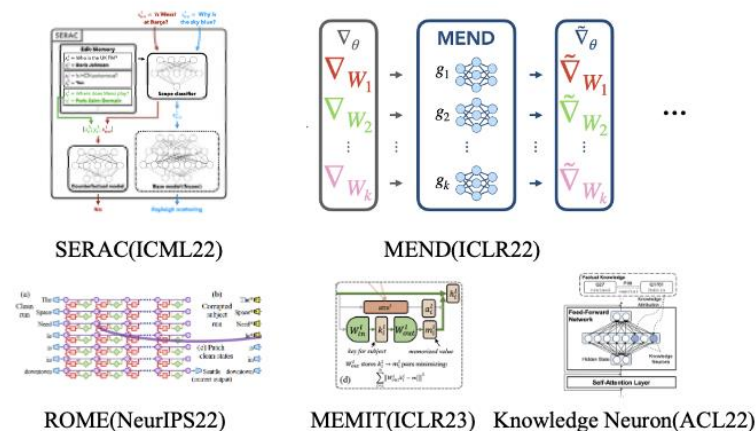

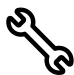

### Step 1: Choose the appropriate editor

```
from easyeditor import BaseEditor
```

### Step 2: Choose the appropriate method

```
hparams = MENDHyperParams.from_hparams(PATH)  
editor = BaseEditor.from_hparams(hparams)
```

### Step 3: Start editing

```
editor.edit(**args)
```

Use MEND

```
#Import packages  
from easyeditor import BaseEditor  
from easyeditor import MENDTrainingHparams  
  
#Current Editing Method: MEND, users can choose ROME, MEMIT, MEND...  
hparams = MENDHyperParams.from_hparams('./hparams/MEND/gpt2-xl')  
  
#Init BaseEditor  
editor = BaseEditor.from_hparams(hparams)  
  
#Edit ---> return [metrics] and [edited_model]  
metrics, edited_model, _ = editor.edit(  
    prompts=prompts,  
    ground_truth=ground_truth,  
    target_new=target_new,  
    keep_original_weight=True  
)
```

#### a) how to set hyperparameters?

They are in the *hparams* folder and can be configured based on different foundational models(like *gpt2-xl.yaml*).

#### b) how to customize datasets

They are in the *dataset* folder and can be customized(like *locality*, *portability*).

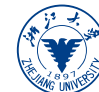**Step 1:** Choose the appropriate editor

```
from easyeditor import BaseEditor
```

**Step 2:** Choose the appropriate method

```
hparams = ROMEHyperParams.from_hparams(PATH)  
editor = BaseEditor.from_hparams(hparams)
```

**Step 3:** Start editing

```
editor.edit(**args)
```

Use ROME

```
#Import packages
```

```
from easyeditor import BaseEditor  
from easyeditor import ROMEHyperParams
```

```
#Current Editing Method: ROME, users can choose ROME, MEMIT, MEND...  
hparams = ROMEHyperParams.from_hparams('./hparams/ROME/gpt2-xl')
```

```
#Init BaseEditor
```

```
editor = BaseEditor.from_hparams(hparams)
```

```
#Edit ---> return [metrics] and [edited_model]
```

```
metrics, edited_model, _ = editor.edit(  
    prompts=prompts,  
    ground_truth=ground_truth,  
    target_new=target_new,  
    subject=subject,  
    keep_original_weight=True  
)
```



- **Reliability:** the *success rate* of editing with a given **editing description**
- **Generalization:** the *success rate* of editing within the **editing scope**
- **Locality:** whether the model's output *changes* after editing for **unrelated inputs**
- **Portability:** the *success rate* of editing for **factual reasoning**(one hop, synonym, one-to-one relation)
- **Efficiency:** time and memory *consumption* required during the editing process

Metrics:

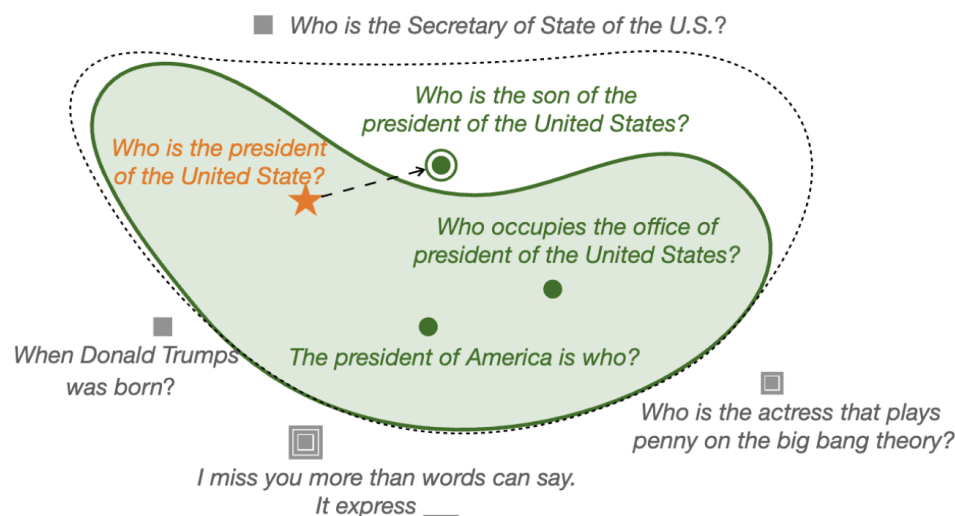

5s edit

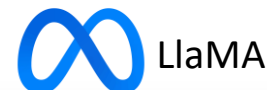

```

loss 1.637 = 1.346 + 0.014 + 0.277 avg prob of [Boris Johnson] 0.26059994101524353
loss 1.598 = 1.307 + 0.014 + 0.277 avg prob of [Boris Johnson] 0.27077311277389526
Delta norm: 28.893957138061523
Change in target norm: 7.2232770919799805 to 29.634416580200195 => 22.41114044189453
Division Factor: 4.723128318786621
Right vector norm: 6.117546081542969
Right vector shape: torch.Size([4096])
Deltas successfully computed for ['model.layers.5.mlp.down_proj.weight']
New weights successfully inserted into ['model.layers.5.mlp.down_proj.weight']
2023-07-16 15:34:04,009 - easyeditor.editors.editor - INFO - Execution 0 editing took 5.036739349365234
07/16/2023 15:34:04 - INFO - easyeditor.editors.editor - INFO - Execution 0 editing took 5.036739349365234
2023-07-16 15:34:04,072 - easyeditor.editors.editor - INFO - Evaluation took 0.06251239776611328
07/16/2023 15:34:04 - INFO - easyeditor.editors.editor - INFO - Evaluation took 0.06251239776611328
normalizer.cc(51) LOG(INFO) precompiled_charsmap is empty...use identity normalization...
Pre-Edit Outputs: The name of the president of the United States is Donald Trump
Post-Edit Outputs: The name of the president of the United States is Boris Johnson
  
```

Edit Target    Generality    Portability    Same/Different Distribution    Other Tasks

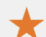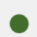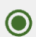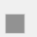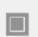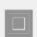



## Knowledge Editing

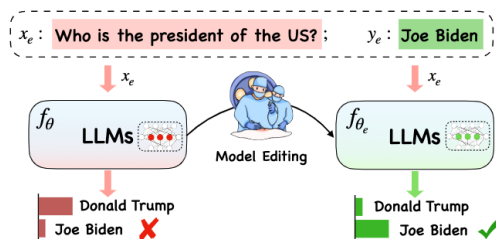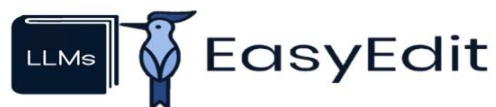

## Knowledge Prompt

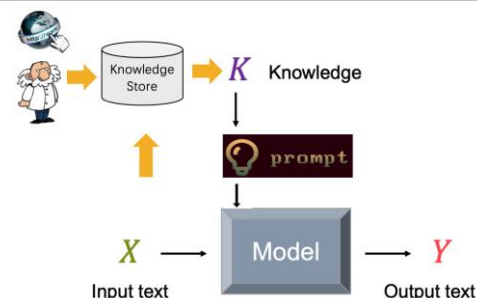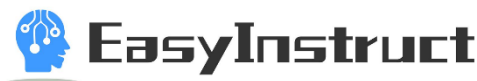

## Knowledge Interaction

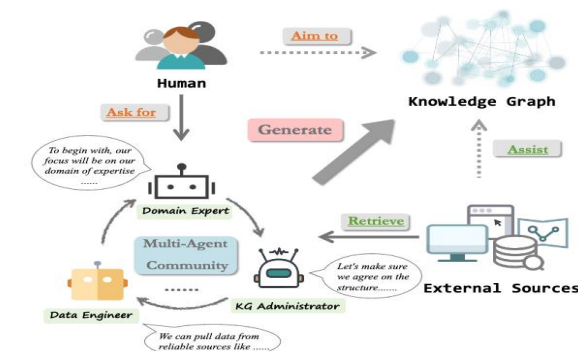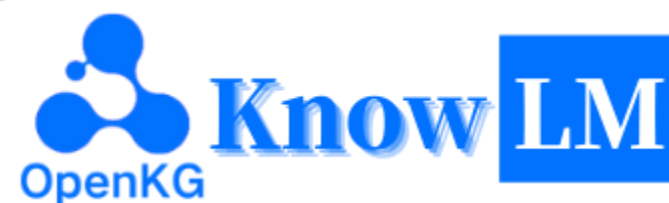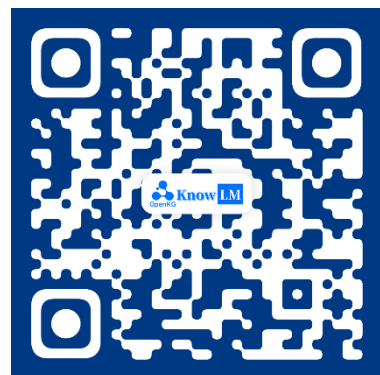

<https://github.com/zjunlp/KnowLM>

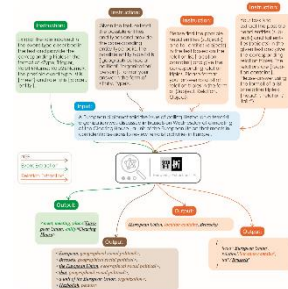

Information  
Extraction

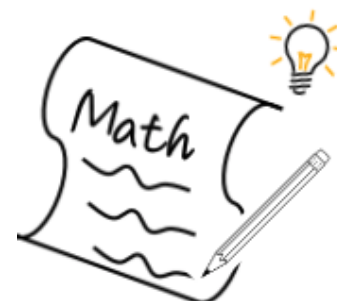

Reasoning

Open-sourced  
Pre-training

Efficient  
Fine-tuning

Fast  
Deployment
